# Supplementary material for: Morphological and Phylogenetic Analyses Reveal Three New Species of Pestalotiopsis (Sporocadaceae, Amphisphaeriales) from Hainan, China
Source: MDPI journal article supplement (doi:10.3390/microorganisms11071627), 2023-06-21
Supplement: s1 [file s1]

**Table S1.** Information of specimens used in this study.

| Fungal species                 | Voucher         | Substrate                         | Country         | GenBank accession |              |             |
|--------------------------------|-----------------|-----------------------------------|-----------------|-------------------|--------------|-------------|
|                                |                 |                                   |                 | ITS               | <i>tef1α</i> | <i>tub2</i> |
| <i>Neopestalotiopsis magna</i> | MFLUCC 12-0652* | <i>Pteridium</i> sp.              | France          | KF582795          | KF582791     | KF582793    |
|                                | CFCC 53011*     | <i>Abies fargesii</i>             | China           | MK397013          | MK622277     | MK622280    |
| <i>Pestalotiopsis abietis</i>  | CFCC 53012      | <i>Abies fargesii</i>             | China           | MK397014          | MK622278     | MK622281    |
|                                | CFCC 53013      | <i>Abies fargesii</i>             | China           | MK397015          | MK622279     | MK622282    |
| <i>P. adusta</i>               | ICMP 6088*      | Refrigerator door                 | Fiji            | JX399006          | JX399070     | JX399037    |
|                                | MFLUCC 10-146   | <i>Syzygium</i> sp.               | Thailand        | JX399007          | JX399071     | JX399038    |
| <i>P. aggestorum</i>           | LC6301*         | <i>Camellia sinensis</i>          | China           | KX895015          | KX895234     | KX895348    |
|                                | LC8186          | <i>Camellia sinensis</i>          | China           | KY464140          | KY464150     | KY464160    |
| <i>P. anacardiacearum</i>      | IFRDCC 2397*    | <i>Mangifera indica</i>           | China           | KC247154          | KC247156     | KC247155    |
| <i>P. anhuiensis</i>           | CFCC 54791*     | <i>Cyclobalanopsis glauca</i>     | China           | ON007028          | ON005045     | ON005056    |
| <i>P. arceuthobii</i>          | CBS 434.65*     | <i>Arceuthobium campylopodium</i> | USA             | KM199341          | KM199516     | KM199427    |
| <i>P. arengae</i>              | CBS 331.92*     | <i>Arenga undulatifolia</i>       | Singapore       | KM199340          | KM199515     | KM199426    |
|                                | CBS 114126*     | <i>Knightia</i> sp.               | New Zealand     | KM199297          | KM199499     | KM199409    |
| <i>P. australasiae</i>         |                 |                                   |                 |                   |              |             |
|                                | CBS 114141      | <i>Protea</i> sp.                 | New South Wales | KM199298          | KM199501     | KM199410    |
|                                | CBS 111503      | <i>Protea neriifolia</i>          | South Africa    | KM199331          | KM199557     | KM199382    |
| <i>P. australis</i>            | CBS 114193*     | <i>Grevillea</i> sp.              | New South Wales | KM199332          | KM199475     | KM199383    |
| <i>P. biciliata</i>            | CBS 124463*     | <i>Platanus hispanica</i>         | Slovakia        | KM199308          | KM199505     | KM199399    |
|                                | CBS 236.38      | <i>Paeonia</i> sp.                | Italy           | KM199309          | KM199506     | KM199401    |
|                                | LC2988*         | <i>Camellia</i> sp.               | China           | KX894933          | KX895150     | KX895265    |
| <i>P. brachiata</i>            | LC8188          | <i>Camellia</i> sp.               | China           | KY464142          | KY464152     | KY464162    |
|                                | LC8189          | <i>Camellia</i> sp.               | China           | KY464143          | KY464153     | KY464163    |
| <i>P. brassicae</i>            | CBS 170.26*     | <i>Brassica napus</i>             | New Zealand     | KM199379          | KM199558     | -           |
| <i>P. camelliae</i>            | MFLUCC 12-0277* | <i>Camellia japonica</i>          | China           | JX399010          | JX399074     | JX399041    |
| <i>P. camelliae-oleiferae</i>  | CSUFTCC08*      | <i>Camelliae oleiferae</i>        | China           | OK493593          | OK507963     | OK562368    |
|                                | CSUFTCC09       | <i>Camelliae oleiferae</i>        | China           | OK493594          | OK507964     | OK562369    |
|                                | CFCC 54430*     | <i>Castanopsis lamontii</i>       | China           | OK339732          | OK358493     | OK358508    |
| <i>P. castanopsidis</i>        | CFCC 54305      | <i>Castanopsis hystrix</i>        | China           | OK339733          | OK358494     | OK358509    |
|                                | CFCC 54384      | <i>Castanopsis hystrix</i>        | China           | OK339734          | OK358495     | OK358510    |
|                                | CBS 186.71*     | <i>Chamaerops humilis</i>         | Italy           | KM199326          | KM199473     | KM199391    |
|                                | LC3619          | <i>Camellia</i> sp.               | China           | KX894991          | KX895208     | KX895322    |
|                                | CFCC 55124      | <i>Quercus acutissima</i>         | China           | OM746221          | OM839993     | OM839894    |
| <i>P. chamaeropsis</i>         | CFCC 55019      | <i>Quercus aliena</i>             | China           | OM746224          | OM839996     | OM839897    |
|                                | CFCC 55023      | <i>Castanopsis fissa</i>          | China           | OM746233          | OM840005     | OM839906    |
|                                | CFCC 54977      | <i>Quercus acutissima</i>         | China           | OM746223          | OM839995     | OM839896    |
|                                | CFCC 55122      | <i>Quercus aliena</i>             | China           | OM746229          | OM840001     | OM839902    |
|                                | CFCC 54776      | <i>Quercus variabilis</i>         | China           | OM746234          | OM840006     | OM839907    |
|                                | CFCC 54314*     | <i>Castanopsis tonkinensis</i>    | China           | OK339739          | OK358500     | OK358515    |
| <i>P. changjiangensis</i>      | CFCC 54433      | <i>Castanopsis hainanensis</i>    | China           | OK339740          | OK358501     | OK358516    |
|                                | CFCC 52803      | <i>Cyclobalanopsis</i> sp.        | China           | OK339741          | OK358502     | OK358517    |
| <i>P. chiaroscuro</i>          | BRIP 72970*     | <i>Sporobolus natalensis</i>      | Australia       | OK422510          | OK423753     | OK423752    |
| <i>P. chinensis</i>            | MFLUCC 12-0273  | <i>Taxus</i> sp.                  | China           | JX398995          | -            | -           |
| <i>P. clavata</i>              | MFLUCC 12-0268* | <i>Buxus</i> sp.                  | China           | JX398990          | JX399056     | JX399025    |
| <i>P. colombiensis</i>         | CBS 118553*     | <i>Eucalyptus urograndis</i>      | Colombia        | KM199307          | KM199488     | KM199421    |
| <i>P. cyclobalanopsidis</i>    | CFCC 54328*     | <i>Cyclobalanopsis glauca</i>     | China           | OK339735          | OK358496     | OK358511    |
|                                | CFCC 55891      | <i>Cyclobalanopsis glauca</i>     | China           | OK339736          | OK358497     | OK358512    |
| <i>P. dianellae</i>            | CPC 32261       | <i>Dianella</i> sp.               | Australia       | MG386051          | -            | MG386164    |

|                             |                     |                                 |                  |                 |                 |                 |
|-----------------------------|---------------------|---------------------------------|------------------|-----------------|-----------------|-----------------|
| <i>P. digitalis</i>         | MFLU 14-0208*       | <i>Digitalis purpurea</i>       | New Zealand      | KP781879        | -               | KP781883        |
| <i>P. dilucida</i>          | LC3232*             | <i>Camellia sinensis</i>        | China            | KX894961        | KX895178        | KX895293        |
|                             | LC8184              | <i>Camellia sinensis</i>        | China            | KY464138        | KY464148        | KY464158        |
| <i>P. diploclisiae</i>      | CBS 115449          | <i>Psychotria tutcheri</i>      | China            | KM199314        | KM199485        | KM199416        |
|                             | CBS 115587*         | <i>Diploclisia glaucescens</i>  | China            | KM199320        | KM199486        | KM199419        |
| <i>P. disseminata</i>       | CBS 143904          | <i>Persea americana</i>         | New Zealand      | MH554152        | MH554587        | MH554825        |
|                             | MEAN 1165           | <i>Pinus pinea</i>              | Portugal         | MT374687        | MT374699        | MT374712        |
| <i>P. diversiseta</i>       | MFLUCC 12-0287*     | <i>Rhododendron</i> sp.         | China            | JX399009        | JX399073        | JX399040        |
| <i>P. doitungensis</i>      | MFLUCC 14-0115*     | <i>Dendrobium</i> sp.           | Thailand         | MK993574        | MK975832        | MK975837        |
| <i>P. dracaenicola</i>      | MFLUCC 18-0913*     | <i>Dracaena</i> sp.             | Thailand         | MN962731        | MN962732        | MN962733        |
| <i>P. dracontomelonis</i>   | MFLU 14-0207*       | <i>Dracontomelon</i> sp.        | Thailand         | KP781877        | KP781880        | -               |
| <i>P. endophytica</i>       | MFLU 20-0607*       | <i>Magnolia garrettii</i>       | Thailand         | MW263946        | MW417119        | -               |
| <i>P. ericacearum</i>       | IFRDCC 2439*        | <i>Rhododendron delavayi</i>    | China            | KC537807        | KC537814        | KC537821        |
| <i>P. etonensis</i>         | BRIP 66615*         | <i>Sporobolus jacquemontii</i>  | Australia        | MK966339        | MK977635        | MK977634        |
|                             | <b>SAUCC230046*</b> | <b><i>Ficus microcarpa</i></b>  | <b>China</b>     | <b>OQ691974</b> | <b>OQ718691</b> | <b>OQ718749</b> |
| <i>P. ficicola</i>          | <b>SAUCC230042</b>  | <b><i>Ficus microcarpa</i></b>  | <b>China</b>     | <b>OQ691972</b> | <b>OQ718689</b> | <b>OQ718747</b> |
|                             | <b>SAUCC230043</b>  | <b><i>Ficus microcarpa</i></b>  | <b>China</b>     | <b>OQ691973</b> | <b>OQ718690</b> | <b>OQ718748</b> |
|                             | CFCC 54440*         | <i>Castanopsis faberi</i>       | China            | ON007029        | ON005046        | ON005057        |
| <i>P. foliicola</i>         | CFCC 57359          | <i>Castanopsis faberi</i>       | China            | ON007030        | ON005047        | ON005058        |
|                             | CFCC 57360          | <i>Castanopsis faberi</i>       | China            | ON007031        | ON005048        | ON005059        |
| <i>P. formosana</i>         | NTUCC 17-009*       | <i>Poaceae</i> sp.              | China            | MH809381        | MH809389        | MH809385        |
| <i>P. furcata</i>           | MFLUCC 12-0054*     | <i>Camellia sinensis</i>        | Thailand         | JQ683724        | JQ683740        | JQ683708        |
|                             | LC6691              | <i>Camellia sinensis</i>        | China            | KX895030        | KX895248        | KX895363        |
| <i>P. gaultheriae</i>       | IFRD 411-014*       | <i>Gaultheria forrestii</i>     | China            | KC537805        | KC537812        | KC537819        |
| <i>P. gibbosa</i>           | NOF 3175*           | <i>Gaultheria shallon</i>       | Canada           | LC311589        | LC311591        | LC311590        |
|                             | E-72-02             | <i>Eucalyptus</i> sp.           | Brazil           | KU926708        | KU926712        | KU926716        |
| <i>P. grandis-urophylla</i> | E-72-03             | <i>Eucalyptus</i> sp.           | Brazil           | KU926709        | KU926713        | KU926717        |
|                             | E-72-04             | <i>Eucalyptus</i> sp.           | Brazil           | KU926710        | KU926714        | KU926718        |
|                             | E-72-06             | <i>Eucalyptus</i> sp.           | Brazil           | KU926711        | KU926715        | KU926719        |
| <i>P. grevilleae</i>        | CBS 114127*         | <i>Grevillea</i> sp.            | Australia        | KM199300        | KM199504        | KM199407        |
|                             | CFCC 54308*         | <i>Quercus griffithii</i>       | China            | OK339737        | OK358498        | OK358513        |
| <i>P. guangxiensis</i>      | CFCC 54300          | <i>Quercus griffithii</i>       | China            | OK339738        | OK358499        | OK358514        |
|                             | CFCC 54803          | <i>Cyclobalanopsis glauca</i>   | China            | ON007035        | ON005052        | ON005063        |
| <i>P. guizhouensis</i>      | CFCC 57364          | <i>Cyclobalanopsis glauca</i>   | China            | ON007036        | ON005053        | ON005064        |
| <i>P. hawaiiensis</i>       | CBS 114491*         | <i>Leucospermum</i> sp.         | USA              | KM199339        | KM199514        | KM199428        |
| <i>P. hispanica</i>         | CBS 115391*         | <i>Protea</i> sp.               | Spain            | MH553981        | MH554399        | MH554640        |
| <i>P. hollandica</i>        | CBS 265.33*         | <i>Sciadopitys verticillata</i> | The Netherlands  | KM199328        | KM199481        | KM199388        |
| <i>P. humicola</i>          | CBS 336.97*         | Soil                            | Papua New Guinea | KM199317        | KM199484        | KM199420        |
| <i>P. hunanensis</i>        | CSUFTCC15*          | <i>Camellia oleifera</i>        | China            | OK493599        | OK507969        | OK562374        |
| <i>P. hunanensis</i>        | CSUFTCC18           | <i>Camellia oleifera</i>        | China            | OK493600        | OK507970        | OK562375        |
| <i>P. hydei</i>             | MFLUCC 20-0135      | <i>Litsea elliptica</i>         | Thailand         | MW266063        | MW251113        | MW251112        |
|                             | CAA 1004*           | <i>Pinus radiata</i>            | Spain            | MW732248        | MW759038        | MW759035        |
| <i>P. iberica</i>           | CAA 1005            | <i>Pinus sylvestris</i>         | Spain            | MW732250        | MW759037        | MW759034        |
|                             | CAA 1006            | <i>Pinus radiata</i>            | Spain            | MW732249        | MW759039        | MW759036        |
| <i>P. inflexa</i>           | MFLUCC 12-0270*     | Unidentified tree               | China            | JX399008        | JX399072        | JX399039        |
| <i>P. intermedia</i>        | MFLUCC 12-0259*     | Unidentified tree               | China            | JX398993        | JX399059        | JX399028        |
| <i>P. italiana</i>          | MFLU 14-0214*       | <i>Cupressus glabra</i>         | Italy            | KP781878        | KP781881        | KP781882        |
| <i>P. jesteri</i>           | CBS 109350*         | <i>Fragraea bodenii</i>         | Papua New Guinea | KM199380        | KM199554        | -               |
| <i>P. jiangxiensis</i>      | LC4399*             | <i>Camellia</i> sp.             | China            | KX895009        | KX895227        | KX895341        |
|                             | LC6636*             | <i>Camellia sinensis</i>        | China            | KX895028        | KX895247        | KX895361        |
| <i>P. jinchanghensis</i>    | LC8190              | <i>Camellia sinensis</i>        | China            | KY464144        | KY464154        | KY464164        |

|                            |                 |                                     |                  |          |          |          |
|----------------------------|-----------------|-------------------------------------|------------------|----------|----------|----------|
| <i>P. kaki</i>             | KNU-PT-1804*    | <i>Diospyros kaki</i>               | Korea            | LC552953 | LC553555 | LC552954 |
| <i>P. kandelicola</i>      | NCYUCC 19-0354  | <i>Kandelia candel</i>              | China            | MT560723 | MT563102 | MT563100 |
|                            | NCYUCC 19-0355* | <i>Kandelia candel</i>              | China            | MT560722 | MT563101 | MT563099 |
| <i>P. kenyanana</i>        | CBS 442.67*     | <i>Coffea</i> sp.                   | Kenya            | KM199302 | KM199502 | KM199395 |
|                            | LC6633          | <i>Camellia sinensis</i>            | China            | KX895027 | KX895246 | KX895360 |
| <i>P. knightiae</i>        | CBS 111963      | <i>Knightia</i> sp.                 | New Zealand      | KM199311 | KM199495 | KM199406 |
|                            | CBS 114138*     | <i>Knightia</i> sp.                 | New Zealand      | KM199310 | KM199497 | KM199408 |
| <i>P. krabiensis</i>       | MFLUCC 16-0260* | <i>Pandanus</i> sp.                 | Thailand         | MH388360 | MH388395 | MH412722 |
| <i>P. leucadendri</i>      | CBS 121417*     | <i>Leucadendron</i> sp.             | South Africa     | MH553987 | MH554412 | MH554654 |
|                            | HGUP 4057*      | <i>Licuala grandis</i>              | China            | KC492509 | KC481684 | KC481683 |
| <i>P. licualicola</i>      | SAUCC210087     | <i>Ilex chinensis</i>               | China            | OK087323 | OK104879 | OK104872 |
|                            | SAUCC210088     | <i>Ilex chinensis</i>               | China            | OK087324 | OK104880 | OK104873 |
| <i>P. lijiangensis</i>     | CFCC 50738*     | <i>Castanopsis carlesii</i>         | China            | KU860520 | KU844185 | -        |
| <i>P. linearis</i>         | MFLUCC 12-0271* | <i>Trachelospermum</i> sp.          | China            | JX398992 | JX399058 | JX399027 |
| <i>P. lithocarp</i>        | CFCC 55100*     | <i>Lithocarpus chiungchungensis</i> | China            | OK339742 | OK358503 | OK358518 |
|                            | CFCC 55893      | <i>Lithocarpus chiungchungensis</i> | China            | OK339743 | OK358504 | OK358519 |
|                            | LC4344*         | <i>Camellia</i> sp.                 | China            | KX895005 | KX895223 | KX895337 |
| <i>P. lushanensis</i>      | LC8182          | <i>Camellia</i> sp.                 | China            | KY464136 | KY464146 | KY464156 |
|                            | LC8183          | <i>Camellia</i> sp.                 | China            | KY464137 | KY464147 | KY464157 |
|                            | CFCC 54894      | <i>Quercus serrata</i>              | China            | OM746282 | OM840054 | OM839955 |
| <i>P. macadamiae</i>       | BRIP 63738b     | <i>Macadamia integrifolia</i>       | Australia        | KX186588 | KX186621 | KX186680 |
|                            | BRIP 63739b     | <i>Macadamia integrifolia</i>       | Australia        | KX186587 | KX186620 | KX186679 |
|                            | BRIP 63741a     | <i>Macadamia integrifolia</i>       | Australia        | KX186586 | KX186619 | KX186678 |
| <i>P. malayana</i>         | CBS 102220*     | <i>Macaranga triloba</i>            | Malaysia         | KM199306 | KM199482 | KM199411 |
| <i>P. microspora</i>       | SS1-033I        | <i>Cornus canadensis</i>            | Canada           | MT644300 | -        | -        |
| <i>P. monochaeta</i>       | CBS 144.97*     | <i>Quercus robur</i>                | The Netherlands  | KM199327 | KM199479 | KM199386 |
|                            | CBS 440.83      | <i>Taxus baccata</i>                | The Netherlands  | KM199329 | KM199480 | KM199387 |
| <i>P. montellica</i>       | MFLUCC 12-0279* | dead plant material                 | China            | JX399012 | JX399076 | JX399043 |
| <i>P. nanjingensis</i>     | CFCC 53882      | <i>Quercus aliena</i>               | China            | OM746295 | OM840067 | OM839968 |
|                            | CSUFTCC16*      | <i>Camellia oleifera</i>            | China            | OK493602 | OK507972 | OK562377 |
| <i>P. nanningensis</i>     | CSUFTCC10*      | <i>Camellia oleifera</i>            | China            | OK493596 | OK507966 | OK562371 |
| <i>P. neolitsea</i>        | NTUCC 17-011*   | <i>Neolitsea villosa</i>            | China            | MH809383 | MH809391 | MH809387 |
|                            | CFCC 54590      | <i>Lithocarpus amygdalifolius</i>   | China            | OK339744 | OK358505 | OK358520 |
| <i>P. novae-hollandiae</i> | CBS 130973*     | <i>Banksia grandis</i>              | Australia        | KM199337 | KM199511 | KM199425 |
|                            | CBS 111522      | <i>Telopea</i> sp.                  | USA              | KM199294 | KM199493 | KM199394 |
| <i>P. oryzae</i>           | CBS 171.26      | Unknown host                        | Italy            | KM199304 | KM199494 | KM199397 |
|                            | CBS 353.69*     | <i>Oryza sativa</i>                 | Denmark          | KM199299 | KM199496 | KM199398 |
| <i>P. pallidotheae</i>     | MAFF 240993*    | <i>Pieris japonica</i>              | Japan            | AB482220 | -        | -        |
| <i>P. pandanicola</i>      | MFLUCC 16-0255* | <i>Pandanus</i> sp.                 | Thailand         | MH388361 | MH388396 | MH412723 |
| <i>P. papuana</i>          | CBS 331.96*     | Coastal soil                        | Papua New Guinea | KM199321 | KM199491 | KM199413 |
|                            | CBS 887.96      | <i>Cocos nucifera</i>               | Papua New Guinea | KM199318 | KM199492 | KM199415 |
| <i>P. parva</i>            | CBS 265.37      | <i>Delonix regia</i>                | -                | KM199312 | KM199508 | KM199404 |
|                            | CBS 278.35*     | <i>Delonix regia</i>                | -                | KM199313 | KM199509 | KM199405 |
| <i>P. phoebes</i>          | SAUCC230093*    | <i>Phoebe zhennan</i>               | China            | OQ692028 | OQ718745 | OQ718803 |
|                            | SAUCC230092     | <i>Phoebe zhennan</i>               | China            | OQ692027 | OQ718744 | OQ718802 |
|                            | SAUCC230094     | <i>Phoebe zhennan</i>               | China            | OQ692029 | OQ718746 | OQ718804 |
| <i>P. photiniicola</i>     | YB28-2          | Unknown                             | China            | MK228997 | MK512491 | MK360938 |
| <i>P. pini</i>             | MEAN 1092       | <i>Pinus pinea</i>                  | Portugal         | MT374680 | MT374693 | MT374705 |

|                                 |                     |                                      |                 |                 |                 |                 |
|---------------------------------|---------------------|--------------------------------------|-----------------|-----------------|-----------------|-----------------|
| <i>P. pinicola</i>              | KUMCC 19-0183*      | <i>Pinus armandii</i>                | China           | MN412636        | MN417509        | MN417507        |
|                                 | CBS 393.48*         | Unknown                              | Portugal        | KM199335        | KM199510        | KM199422        |
| <i>P. portugalica</i>           | LC4324              | <i>Camellia chekiangoleosa</i>       | China           | KX895001        | KX895219        | KX895333        |
| <i>P. rhizophorae</i>           | MFLUCC 17-0416*     | <i>Rhizophora mucronata</i>          | Thailand        | MK764283        | MK764327        | MK764349        |
| <i>P. rhododendri</i>           | IFRDCC 2399*        | <i>Rhododendron sinogrande</i>       | China           | KC537804        | KC537811        | KC537818        |
|                                 | CFCC 54733          | <i>Quercus aliena</i>                | China           | OM746310        | OM840082        | OM839983        |
| <i>P. rhodomyrtus</i>           | CFCC 55052          | <i>Cyclobalanopsis augustinii</i>    | China           | OM746311        | OM840083        | OM839984        |
| <i>P. rosea</i>                 | MFLUCC 12-0258*     | <i>Pinus</i> sp.                     | China           | JX399005        | JX399069        | JX399036        |
| <i>P. scoparia</i>              | CBS 176.25*         | <i>Chamaecyparis</i> sp.             | China           | KM199330        | KM199478        | KM199393        |
| <i>P. sequoiae</i>              | MFLUCC 13-0399*     | <i>Sequoia sempervirens</i>          | Italy           | KX572339        | -               | -               |
|                                 | CFCC 54958*         | <i>Quercus variabilis</i>            | China           | ON007026        | ON005043        | ON005054        |
| <i>P. shaanxiensis</i>          | CFCC 57356          | <i>Quercus variabilis</i>            | China           | ON007027        | ON005044        | ON005055        |
| <i>P. shorea</i>                | MFLUCC 12-0314*     | <i>Shorea obtusa</i>                 | Thailand        | KJ503811        | KJ503817        | KJ503814        |
|                                 | CFCC 55296*         | <i>Cyclobalanopsis kerrii</i>        | China           | ON007032        | ON005049        | ON005060        |
| <i>P. silvicola</i>             | CFCC 54915          | <i>Cyclobalanopsis kerrii</i>        | China           | ON007033        | ON005050        | ON005061        |
|                                 | CFCC 57363          | <i>Cyclobalanopsis kerrii</i>        | China           | ON007034        | ON005051        | ON005062        |
|                                 | <b>SAUCC231201*</b> | <b><i>Spatholobus suberectus</i></b> | <b>China</b>    | <b>OQ692023</b> | <b>OQ718740</b> | <b>OQ718798</b> |
|                                 | <b>SAUCC231203</b>  | <b><i>Spatholobus suberectus</i></b> | <b>China</b>    | <b>OQ692024</b> | <b>OQ718741</b> | <b>OQ718799</b> |
| <i>P. spatholobi</i>            | <b>SAUCC231204</b>  | <b><i>Spatholobus suberectus</i></b> | <b>China</b>    | <b>OQ692025</b> | <b>OQ718742</b> | <b>OQ718800</b> |
|                                 | <b>SAUCC231213</b>  | <b><i>Spatholobus suberectus</i></b> | <b>China</b>    | <b>OQ692026</b> | <b>OQ718743</b> | <b>OQ718801</b> |
| <i>P. spathulata</i>            | CBS 356.86*         | <i>Gevuina avellana</i>              | Chile           | KM199338        | KM199513        | KM199423        |
| <i>P. spathuliappendiculata</i> | CBS 144035*         | <i>Phoenix canariensis</i>           | Australia       | MH554172        | MH554607        | MH554845        |
|                                 | CBS 114137          | <i>Protea</i> sp.                    | Australia       | KM199301        | KM199559        | KM199469        |
| <i>P. telopeae</i>              | CBS 114161*         | <i>Telopea</i> sp.                   | Australia       | KM199296        | KM199500        | KM199403        |
|                                 | CBS 113606          | <i>Telopea</i> sp.                   | Australia       | KM199295        | KM199498        | KM199402        |
| <i>P. terricola</i>             | CBS 141.69*         | Soil                                 | Pacific islands | MH554004        | MH554438        | MH554680        |
| <i>P. thailandica</i>           | MFLUCC 17-1616*     | <i>Rhizophora mucronata</i>          | Thailand        | MK764285        | MK764329        | MK764351        |
|                                 | OP068*              | <i>Trachycarpus fortunei</i>         | China           | JQ845947        | JQ845946        | JQ845945        |
| <i>P. trachycarpicola</i>       | IFRDCC 2403         | <i>Podocarpus macrophyllus</i>       | China           | KC537809        | KC537816        | KC537823        |
|                                 | LC4523              | <i>Camellia sinensis</i>             | China           | KX895011        | KX895230        | KX895344        |
| <i>P. unicolor</i>              | MFLUCC 12-0276*     | <i>Rhododendron</i> sp.              | China           | JX398999        | -               | JX399030        |
|                                 | MFLUCC 12-0275      | Unidentified tree                    | China           | JX398998        | JX399063        | JX399029        |
| <i>P. verruculosa</i>           | MFLUCC 12-0274*     | <i>Rhododendron</i> sp.              | China           | JX398996        | JX399061        | -               |
|                                 | LC4553*             | <i>Camellia sinensis</i>             | China           | KX895012        | KX895231        | KX895345        |
| <i>P. yanglingensis</i>         | LC3412              | <i>Camellia sinensis</i>             | China           | KX894980        | KX895197        | KX895312        |
| <i>P. yunnanensis</i>           | HMAS 96359*         | <i>Podocarpus macrophyllus</i>       | China           | AY373375        | -               | -               |

Notes: Ex-type strains are marked with “\*”. Novel species introduced are in bold in this study.
